# Supplementary material for: Functionalized organotellurium macrocycles: tuning their optical bandgap and investigation of their catalytic activity
Source: Royal Society of Chemistry journal article supplement (doi:10.1039/d4dt03388d), 2025-01-01
Supplement: d4dt03388d1.pdf [file d4dt03388d1.pdf]

# **Functionalized organotellurium macrocycles: Tuning optical bandgap and investigation of catalytic activity**

Calvin Samuel,<sup>a</sup> Velpula Pramod,<sup>a</sup> Swandhana V. S.,<sup>a</sup> Alexander Steiner<sup>b\*</sup> and Viswanathan Baskar<sup>a\*</sup>

**Table S1:** Crystallographic information of **Br-TAM** and **I-TAM**.

| Compound                                     | Br-TAM                                                                                                         | I-TAM                                                                                         |
|----------------------------------------------|----------------------------------------------------------------------------------------------------------------|-----------------------------------------------------------------------------------------------|
| Empirical formula                            | C <sub>76</sub> H <sub>78</sub> Cl <sub>6</sub> Br <sub>2</sub> O <sub>14</sub> P <sub>2</sub> Te <sub>4</sub> | C <sub>74</sub> H <sub>76</sub> I <sub>2</sub> O <sub>14</sub> P <sub>2</sub> Te <sub>4</sub> |
| Formula weight                               | 2160.24                                                                                                        | 2015.48                                                                                       |
| Temperature/K                                | 297(1)                                                                                                         | 298                                                                                           |
| Crystal system                               | monoclinic                                                                                                     | triclinic                                                                                     |
| Space group                                  | <i>P2<sub>1</sub>/n</i>                                                                                        | <i>P-1</i>                                                                                    |
| a/Å                                          | 13.3140(4)                                                                                                     | 15.0680(3)                                                                                    |
| b/Å                                          | 23.7299(7)                                                                                                     | 17.3015(6)                                                                                    |
| c/Å                                          | 14.1869(5)                                                                                                     | 19.5456(5)                                                                                    |
| α/°                                          | 90                                                                                                             | 78.761(2)                                                                                     |
| β/°                                          | 106.379(3)                                                                                                     | 81.495(2)                                                                                     |
| γ/°                                          | 90                                                                                                             | 85.877(2)                                                                                     |
| Volume/Å <sup>3</sup>                        | 4300.3(2)                                                                                                      | 4938.0(2)                                                                                     |
| Z                                            | 2                                                                                                              | 2                                                                                             |
| ρ <sub>calc</sub> /cm <sup>3</sup>           | 1.668                                                                                                          | 1.356                                                                                         |
| F(000)                                       | 2112.0                                                                                                         | 1952.0                                                                                        |
| Crystal size/mm <sup>3</sup>                 | 0.1 × 0.1 × 0.1                                                                                                | 0.1 × 0.05 × 0.05                                                                             |
| Radiation                                    | MoKα (λ = 0.71073)                                                                                             | MoKα (λ = 0.71073)                                                                            |
| 2θ range for data collection/°               | 3.706 to 54.334                                                                                                | 3.706 to 50.054                                                                               |
| Index ranges                                 | -16 ≤ h ≤ 16,<br>-29 ≤ k ≤ 29,<br>-17 ≤ l ≤ 17                                                                 | -17 ≤ h ≤ 17,<br>-20 ≤ k ≤ 20,<br>-23 ≤ l ≤ 23                                                |
| Reflections collected                        | 42307                                                                                                          | 79163                                                                                         |
| Independent reflections                      | 9028 [R <sub>int</sub> = 0.1116, R <sub>sigma</sub> = 0.0871]                                                  | 17366 [R <sub>int</sub> = 0.1063, R <sub>sigma</sub> = 0.0888]                                |
| Data/restraints/parameters                   | 9028/0/473                                                                                                     | 17366/2324/844                                                                                |
| Goodness-of-fit on F <sup>2</sup>            | 0.992                                                                                                          | 0.980                                                                                         |
| Final R indexes (F)[I>2σ(I)]                 | R <sub>1</sub> = 0.0622, wR <sub>2</sub> = 0.1594                                                              | R <sub>1</sub> = 0.0549, wR <sub>2</sub> = 0.1411                                             |
| Final R indexes (F <sup>2</sup> ) [all data] | R <sub>1</sub> = 0.0931, wR <sub>2</sub> = 0.1784                                                              | R <sub>1</sub> = 0.1155, wR <sub>2</sub> = 0.1716                                             |
| Largest diff. peak/hole / e Å <sup>-3</sup>  | 2.10/-1.26                                                                                                     | 0.60/-0.57                                                                                    |
| Completeness to θ <sub>max</sub> , %         | 99.3                                                                                                           | 99.5                                                                                          |

**Table S2:** Selected Bond lengths (Å) and Bond angles (°) of **Br-TAM**.

|     |                  |           |                  |     |                  |            |
|-----|------------------|-----------|------------------|-----|------------------|------------|
| Br1 | Te1              | 3.3567(8) | Te1              | Br1 | Te1 <sup>1</sup> | 97.441(19) |
| Br1 | Te1 <sup>1</sup> | 3.4936(8) | Te1 <sup>1</sup> | Br1 | Te2 <sup>1</sup> | 59.828(14) |
| Br1 | Te2 <sup>1</sup> | 3.5434(7) | Te1              | Br1 | Te2              | 61.991(16) |
| Br1 | Te2              | 3.4565(8) | Te1              | Br1 | Te2 <sup>1</sup> | 68.805(15) |
| Te1 | O1               | 1.972(4)  | Br1              | Te1 | Br1 <sup>1</sup> | 82.559(19) |
| Te1 | O2               | 2.368(4)  | O1               | Te1 | Br1              | 79.65(12)  |
| Te1 | C11              | 2.113(7)  | O1               | Te1 | O2               | 168.68(16) |
| Te1 | C21              | 2.087(6)  | O1               | Te1 | C11              | 88.6(2)    |
| Te2 | O1               | 1.983(4)  | O2               | Te1 | Br1              | 107.70(12) |
| Te2 | O31              | 2.353(4)  | C11              | Te1 | Br1              | 164.88(18) |
| Te2 | C31              | 2.101(7)  | C11              | Te1 | O2               | 85.4(2)    |
| Te2 | C41              | 2.118(5)  | C21              | Te1 | O2               | 82.58(19)  |
| P1  | O3               | 1.502(5)  | C21              | Te1 | C11              | 97.4(2)    |
| P1  | C51              | 1.788(7)  | O2               | P1  | C51              | 109.4(3)   |
| P1  | C57              | 1.810(7)  | O2               | P1  | C57              | 105.3(3)   |
| O10 | C17              | 1.434(12) | O3               | P1  | O2               | 116.8(2)   |
| O20 | C27              | 1.336(13) | O3               | P1  | C51              | 108.2(3)   |
| C31 | C32              | 1.381(8)  | Te1              | O1  | Te2              | 125.1(2)   |
| C32 | C33              | 1.362(11) | P1               | O2  | Te1              | 140.1(3)   |
| C33 | C34              | 1.389(11) | C52              | C51 | P1               | 120.0(5)   |
| O30 | C37              | 1.363(11) | C56              | C51 | P1               | 121.8(6)   |
| C60 | Cl1              | 1.810(13) | Cl2              | C60 | Cl1              | 103.0(8)   |
| C60 | Cl2              | 1.753(12) | Cl3              | C60 | Cl1              | 102.9(8)   |
| C60 | Cl3              | 1.676(11) | O10              | C14 | C15              | 114.7(8)   |

<sup>1</sup><sub>1-X,1-Y,1-Z</sub>

**Table S3:** Selected Bond lengths (Å) and Bond angles (°) of **I-TAM**.

|      |      |            |      |      |      |            |
|------|------|------------|------|------|------|------------|
| I1   | Te1  | 3.6559(7)  | Te1  | I1   | Te11 | 91.434(16) |
| I1   | Te11 | 3.7738(8)  | Te1  | I1   | Te21 | 65.428(14) |
| I1   | Te2  | 3.6770(9)  | Te1  | I1   | Te2  | 56.511(15) |
| I1   | Te21 | 3.6856(8)  | Te2  | I1   | Te11 | 64.339(15) |
| I2   | Te3  | 3.7472(10) | I1   | Te1  | I11  | 88.566(16) |
| I2   | Te4  | 3.6486(9)  | O1   | Te1  | I11  | 79.84(13)  |
| Te1  | O1   | 1.974(5)   | O1   | Te1  | O2   | 170.11(18) |
| Te1  | O2   | 2.342(5)   | O1   | Te1  | C11  | 88.7(2)    |
| Te1  | C11  | 2.113(6)   | O1   | Te1  | C21  | 90.0(3)    |
| Te2  | O31  | 2.349(5)   | C11  | Te1  | I1   | 88.99(19)  |
| Te2  | C41  | 2.099(13)  | C11  | Te1  | O2   | 85.3(2)    |
| Te2  | C41' | 2.173(17)  | C21  | Te1  | I1   | 169.7(2)   |
| O2   | P1   | 1.481(6)   | C21  | Te1  | I11  | 86.4(2)    |
| O3   | P1   | 1.493(5)   | C21  | Te1  | C11  | 94.2(3)    |
| O20  | C27  | 1.438(13)  | Te2  | O1   | Te1  | 124.1(2)   |
| O20' | C27' | 1.397(15)  | P1   | O2   | Te1  | 135.2(3)   |
| C31  | C32  | 1.357(9)   | P1   | O3   | Te21 | 138.0(3)   |
| C31  | C36  | 1.379(8)   | Te4  | O4   | Te3  | 123.6(2)   |
| C32  | C33  | 1.408(9)   | P2   | O5   | Te3  | 137.9(4)   |
| C33  | C34  | 1.354(9)   | P2   | O6   | Te42 | 132.0(3)   |
| P1   | C121 | 1.728(13)  | O5   | P2   | O6   | 117.6(3)   |
| P1   | C12A | 1.780(18)  | O5   | P2   | C21A | 93.0(7)    |
| O5   | P2   | 1.490(5)   | C221 | P2   | C21A | 125.9(8)   |
| O6   | P2   | 1.508(6)   | C22B | C221 | P2   | 115.0(13)  |

<sup>1</sup>2-X,2-Y,-Z; <sup>2</sup>1-X,1-Y,1-Z

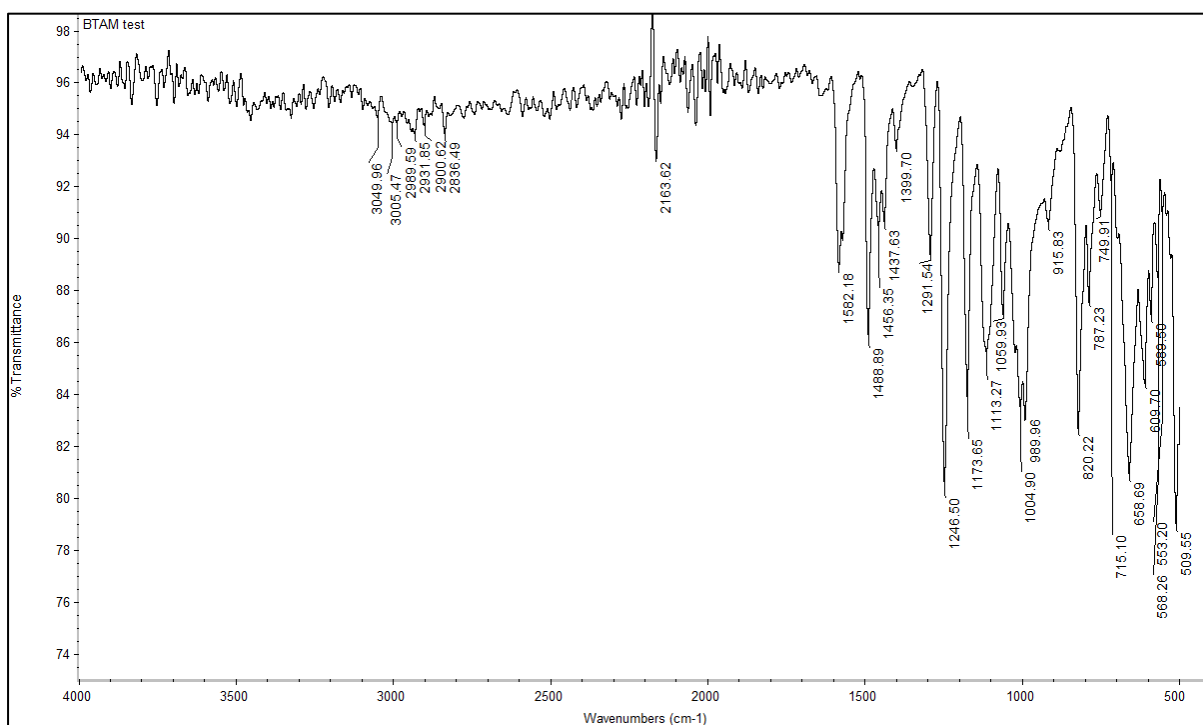

Figure S1: FTIR spectrum of Br-TAM.

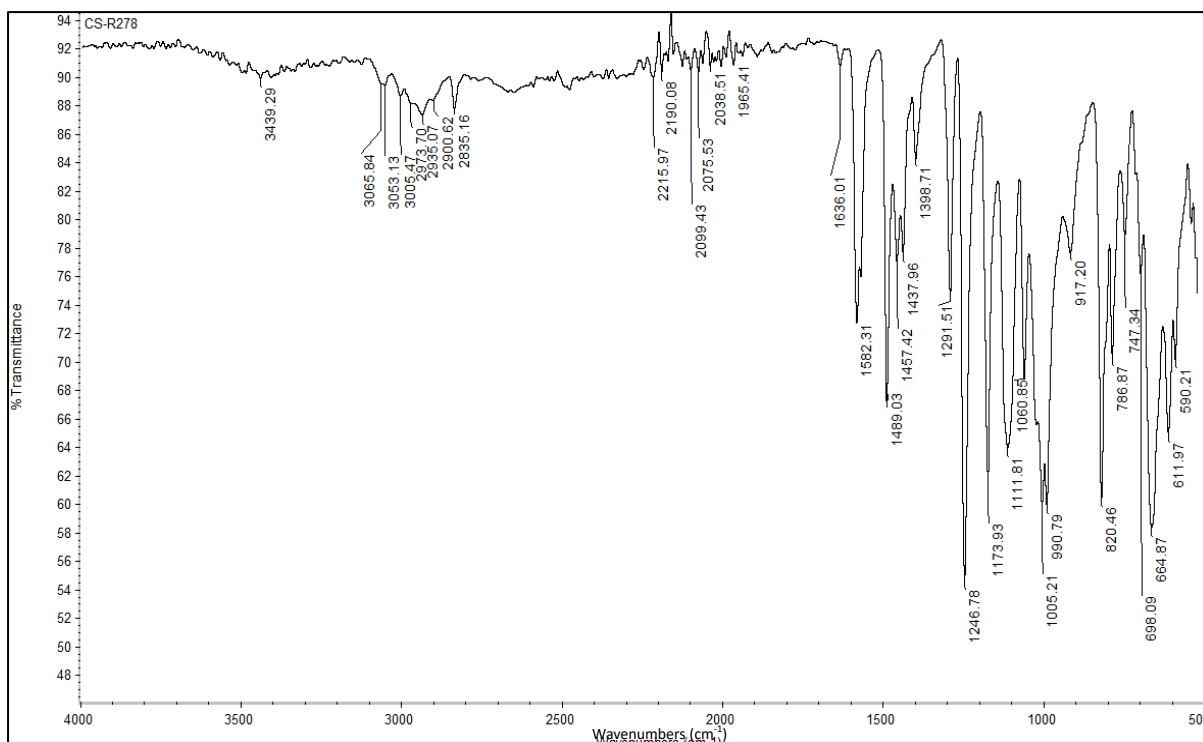

**Figure S2:** FTIR spectrum of I-TAM.

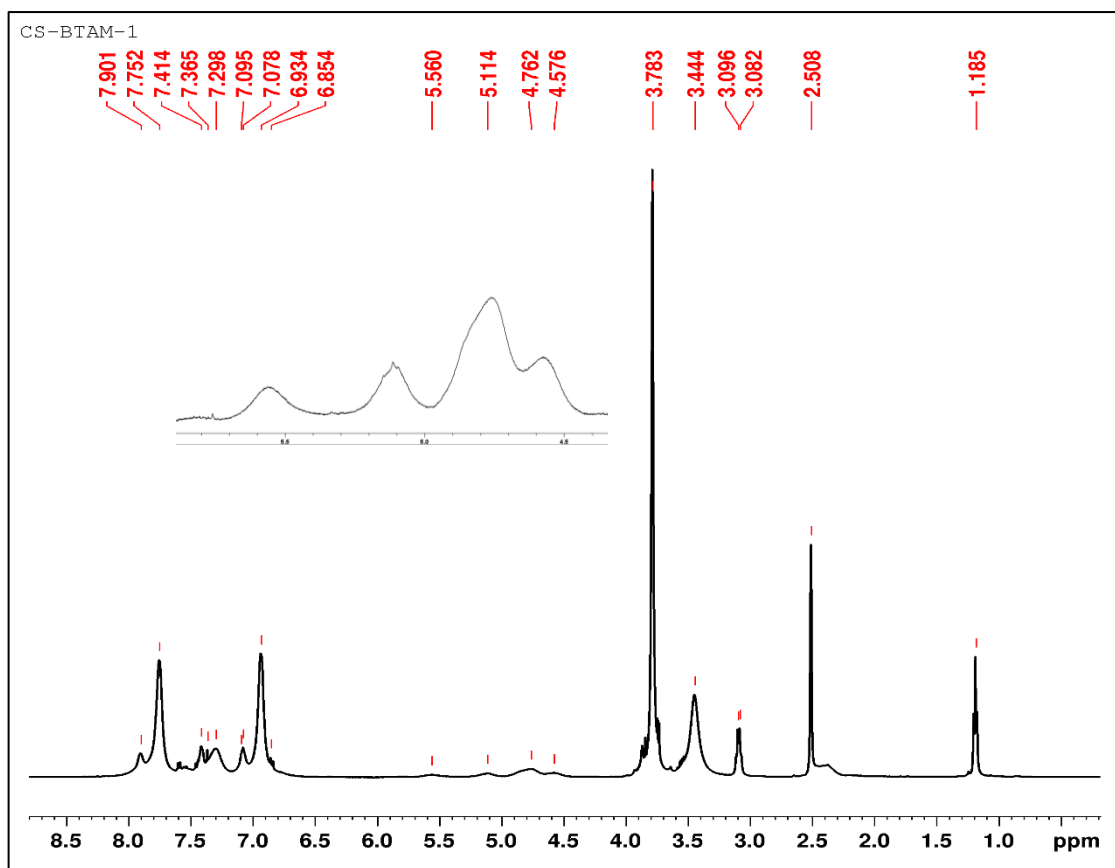

Figure S3:  $^1\text{H}$ NMR of Br-TAM in DMSO- $\text{d}_6$ .

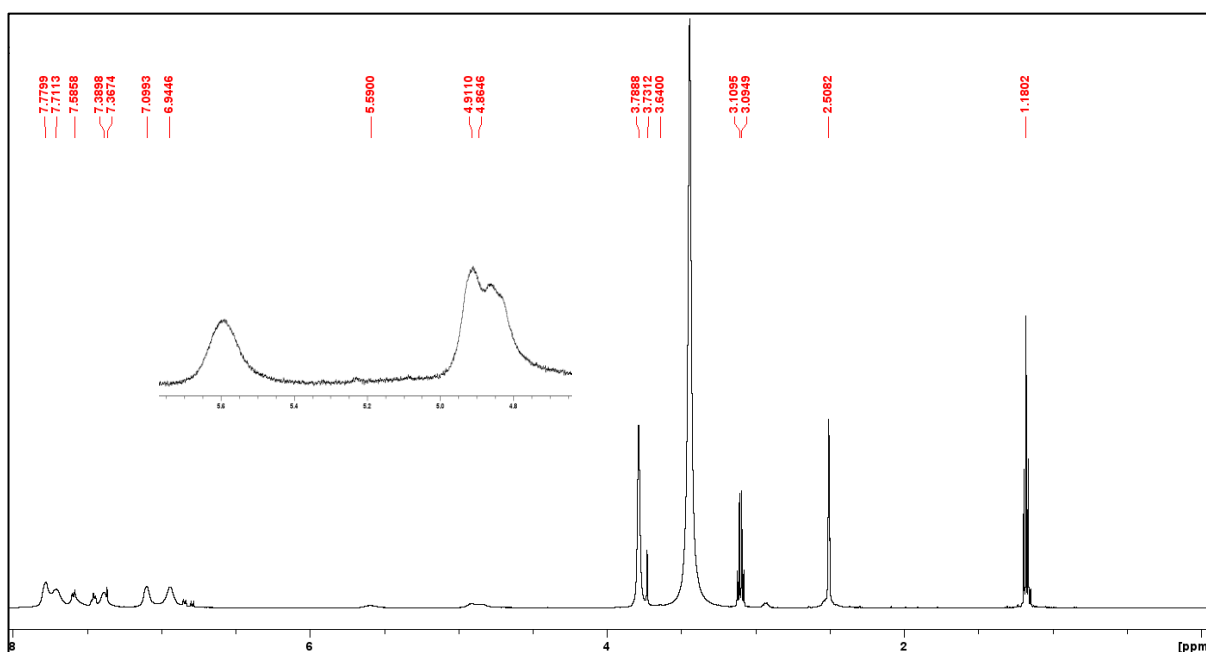

Figure S4:  $^1\text{H}$ NMR of I-TAM in DMSO- $\text{d}_6$ .

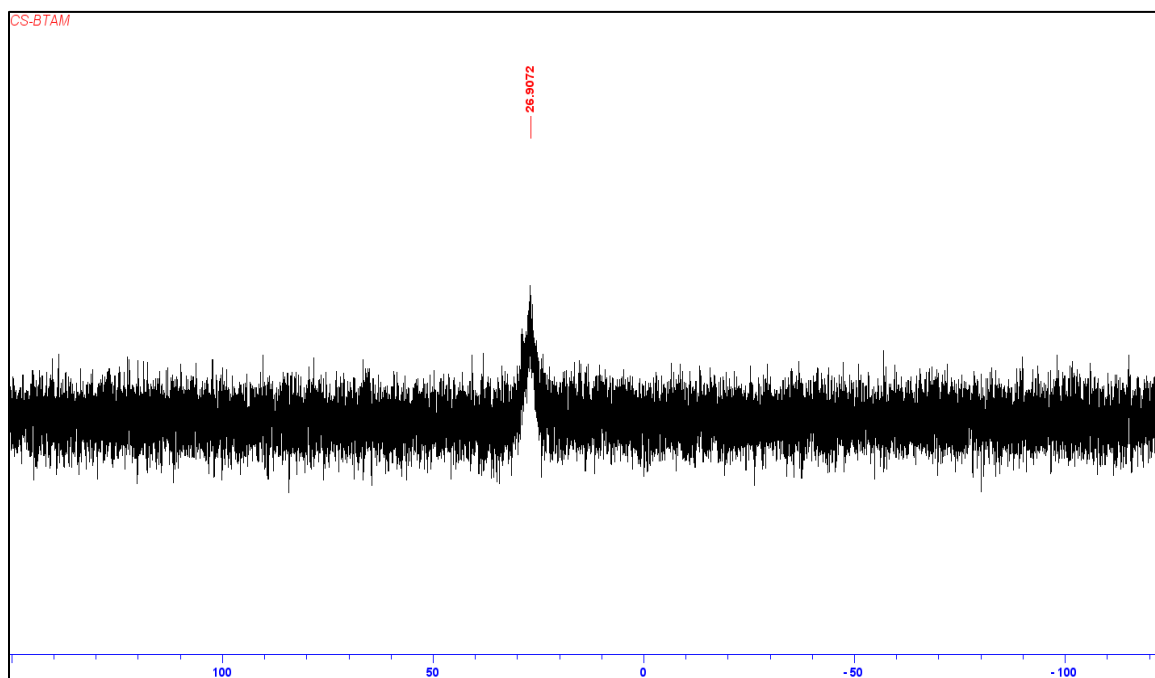

Figure S5:  $^{31}\text{P}$  NMR of **Br-TAM** in  $\text{DMSO-d}_6$ .

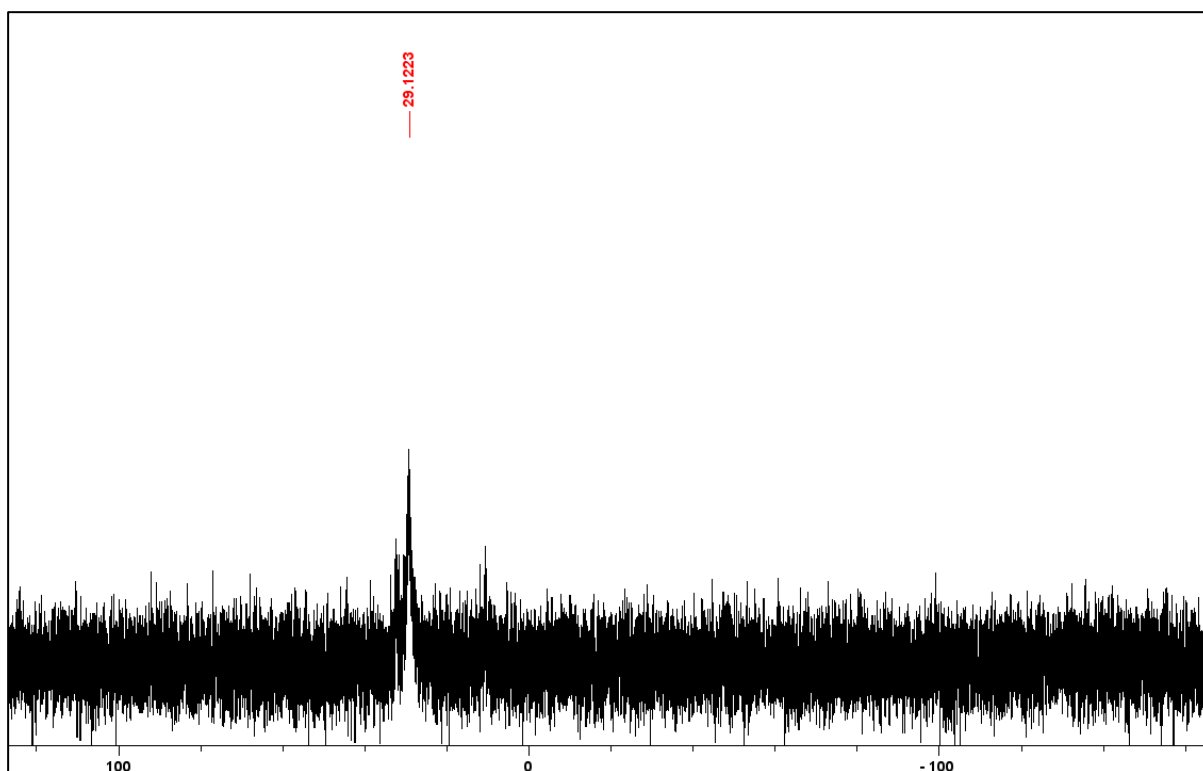

Figure S6:  $^{31}\text{P}$  NMR of **I-TAM** in  $\text{DMSO-d}_6$ .



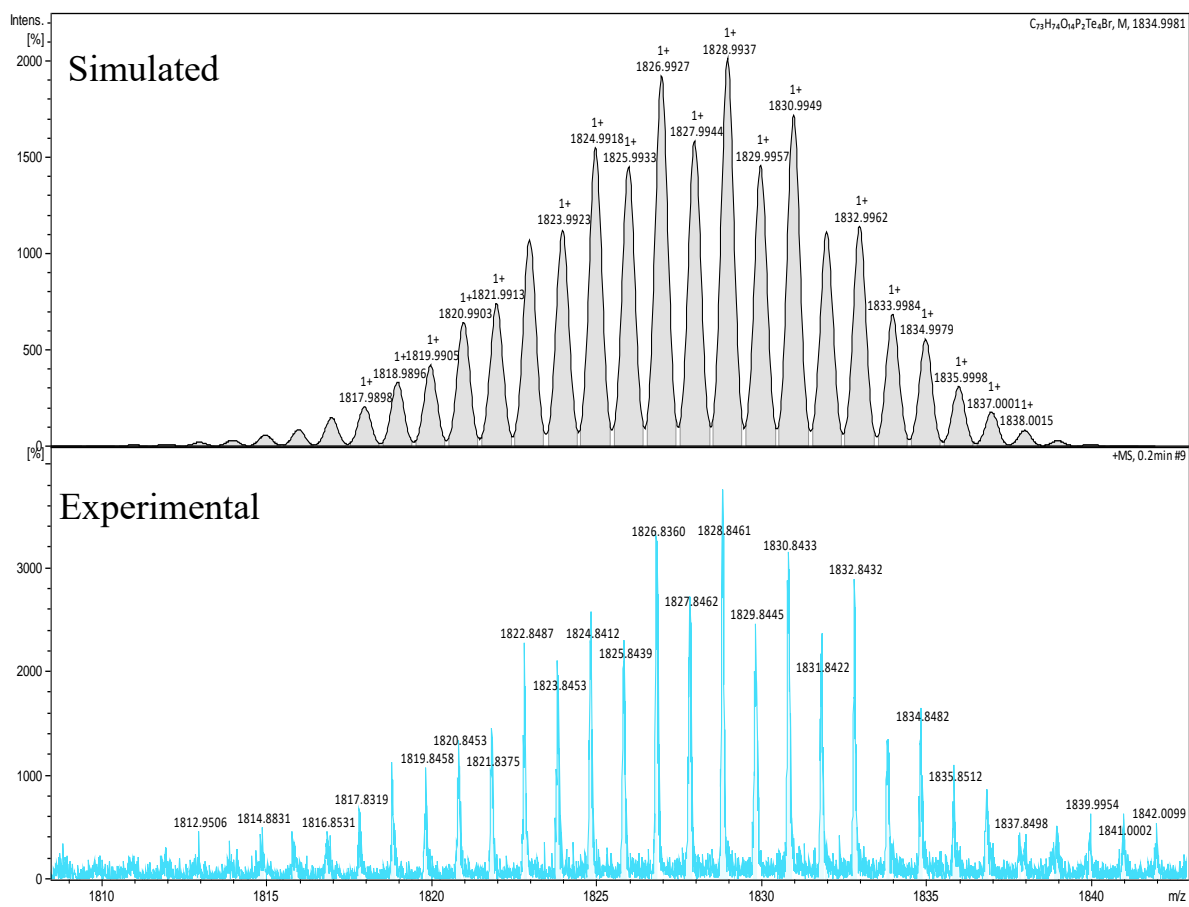

**Figure S7: ESI-MS of Br-TAM.**

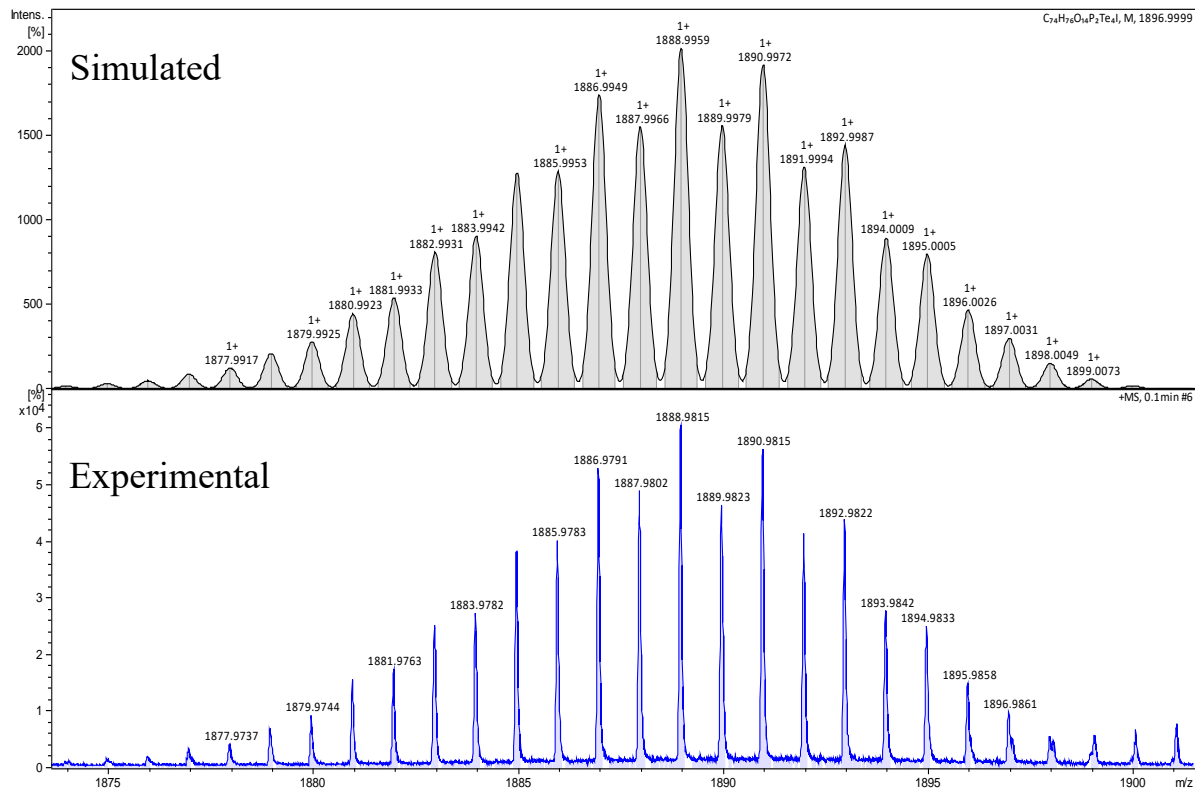

**Figure S8: ESI-MS of I-TAM.**

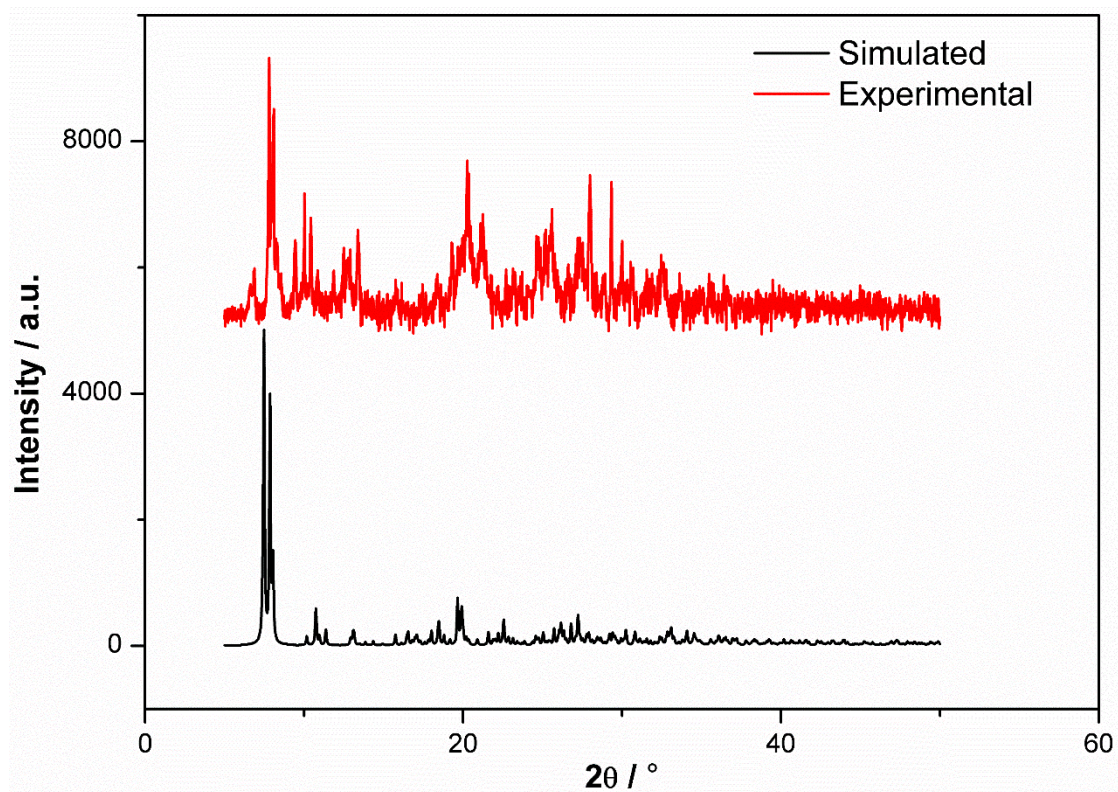

Figure S9: PXRD diffraction pattern of a bulk sample of **Br-TAM**.

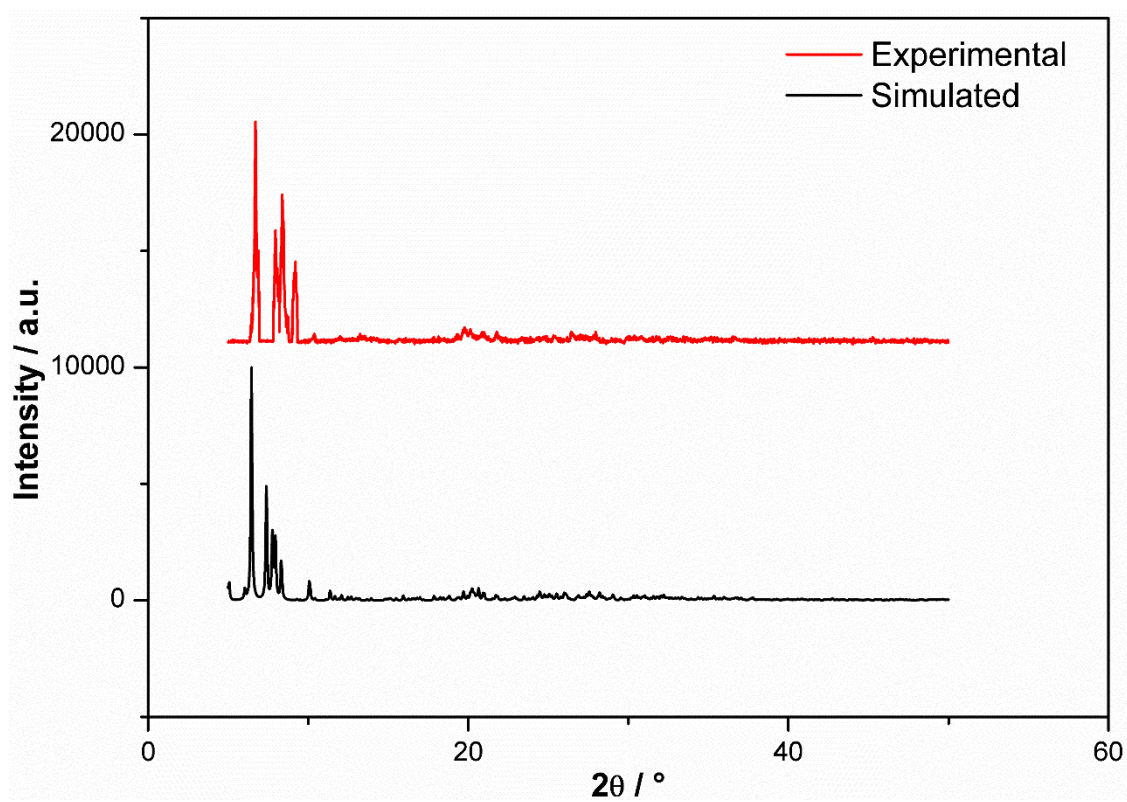

Figure S10: PXRD diffraction pattern of a bulk sample of **I-TAM**.

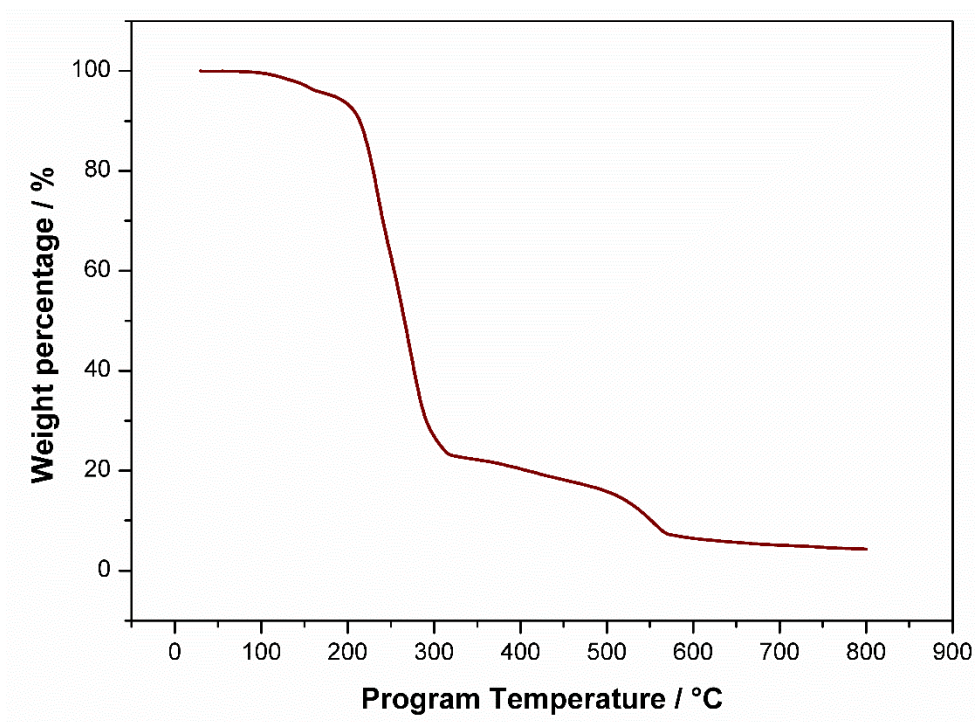

Figure S11: TGA of Br-TAM.

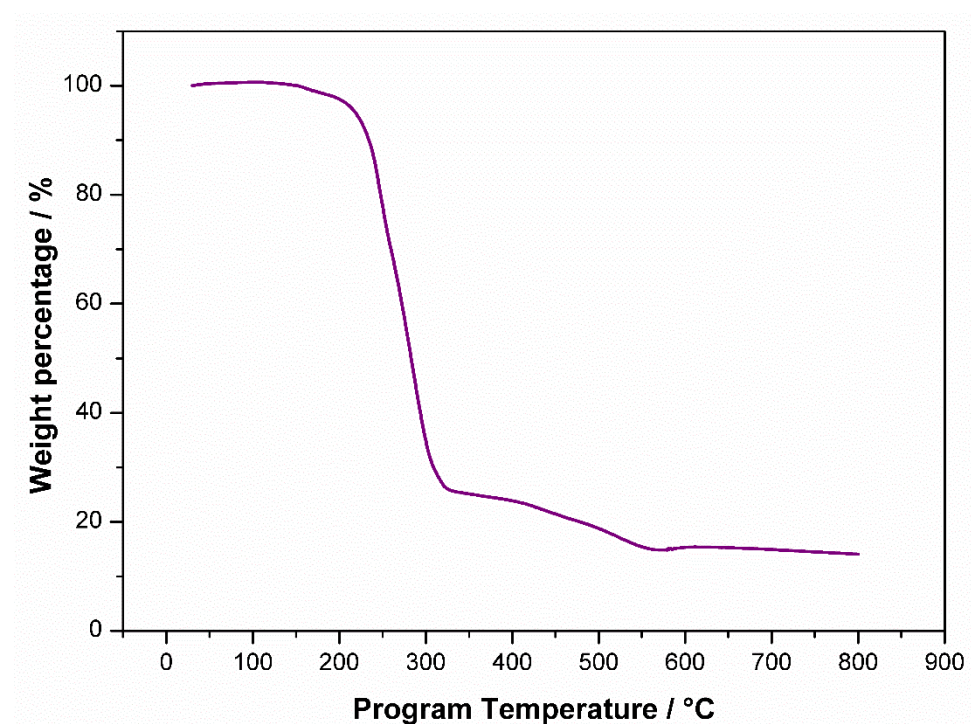

Figure S12: TGA of I-TAM.

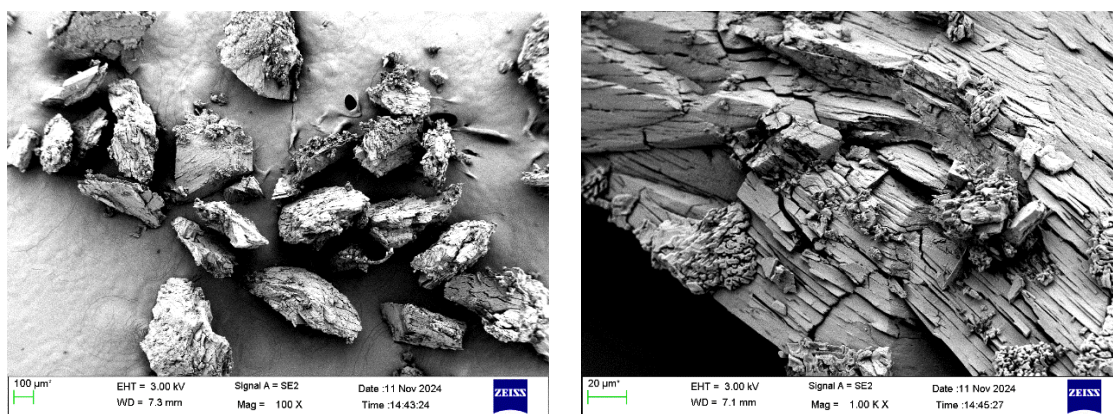

Figure S13: FESEM images of Br-TAM.

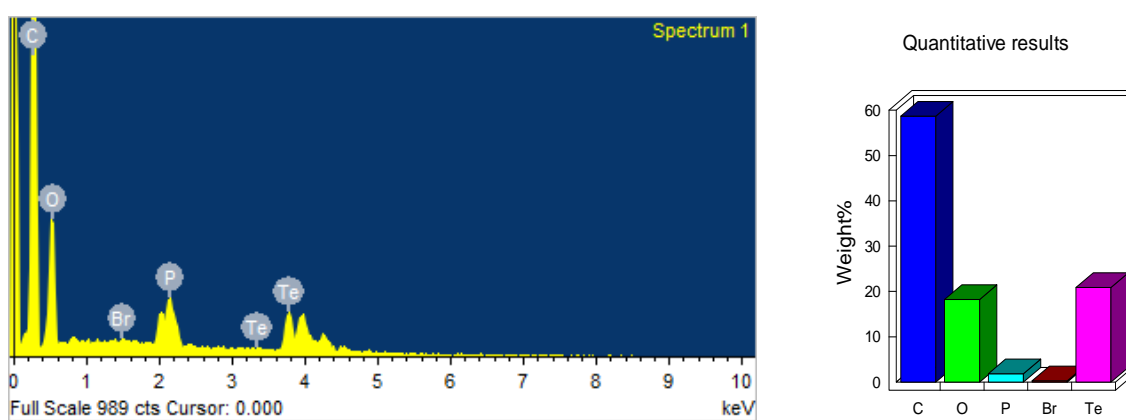

Figure S14: EDAX spectrum of Br-TAM.

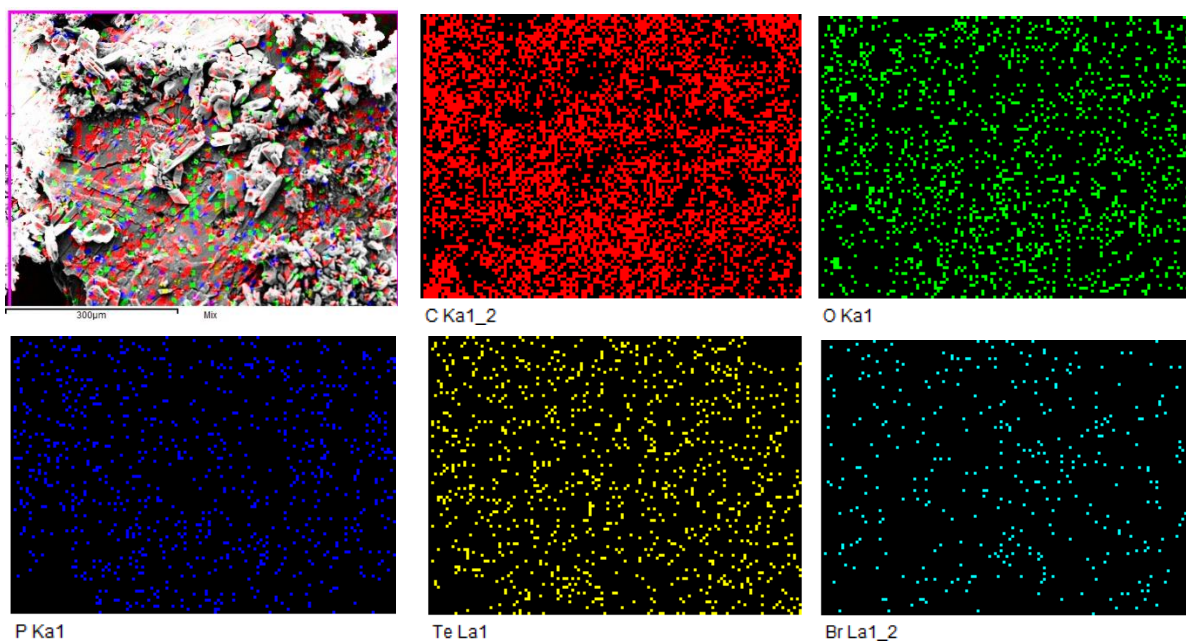

Figure S15: Elemental mapping of Br-TAM.

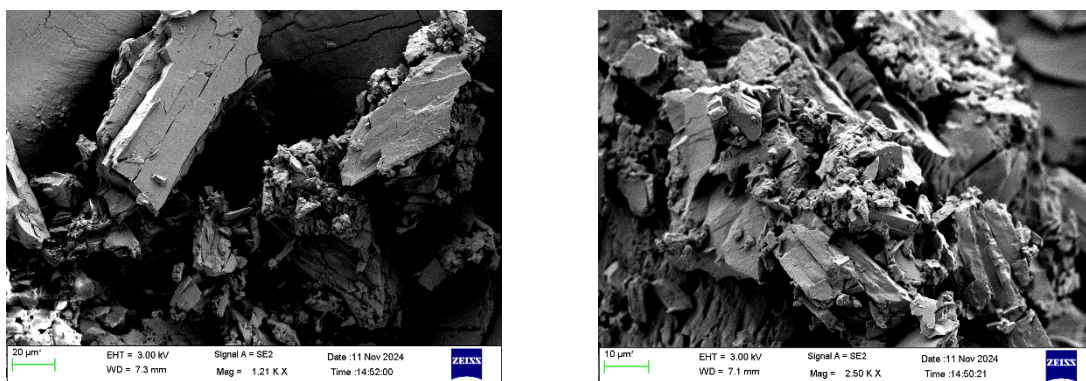

**Figure S16:** FESEM images of I-TAM.

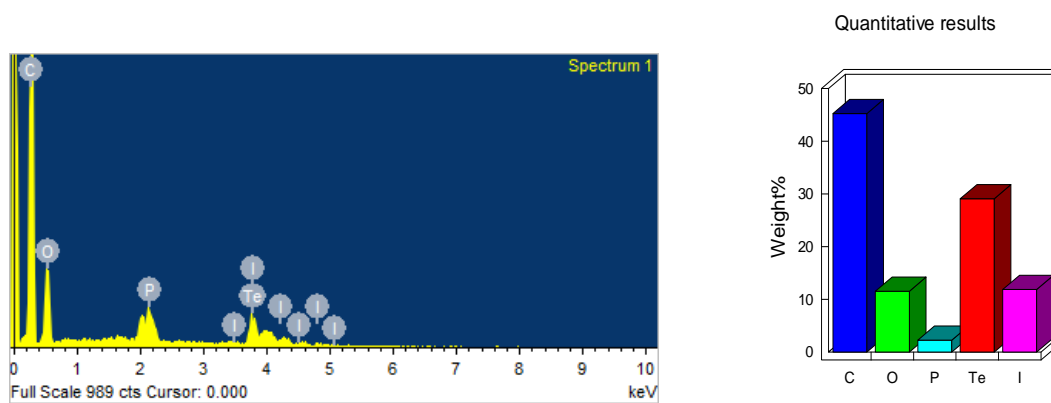

**Figure S17:** EDAX spectrum of I-TAM.

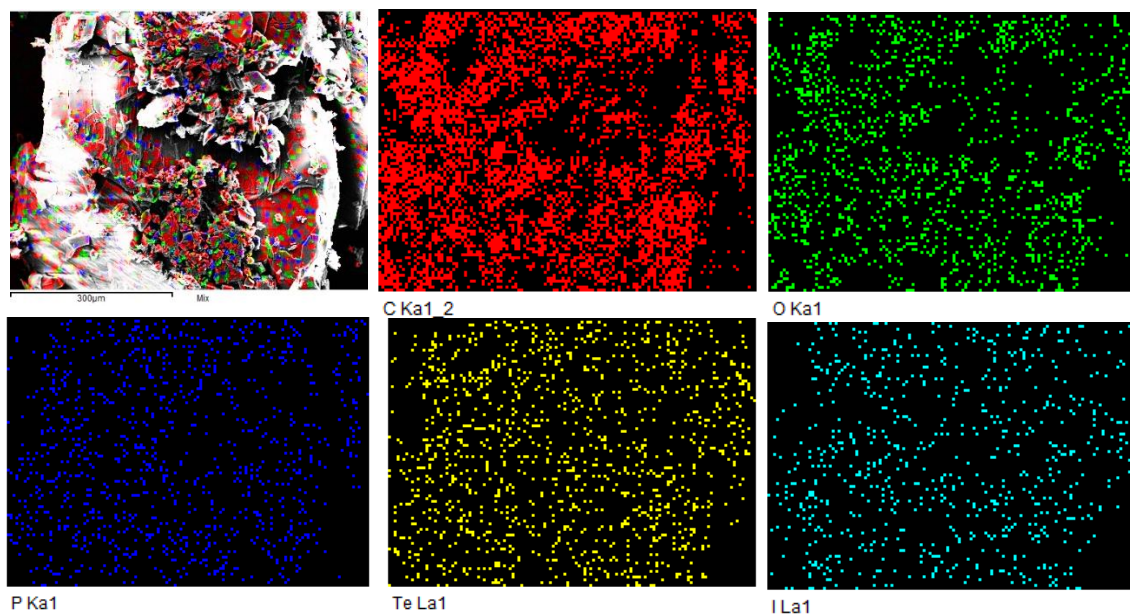

**Figure S18:** Elemental mapping of I-TAM.

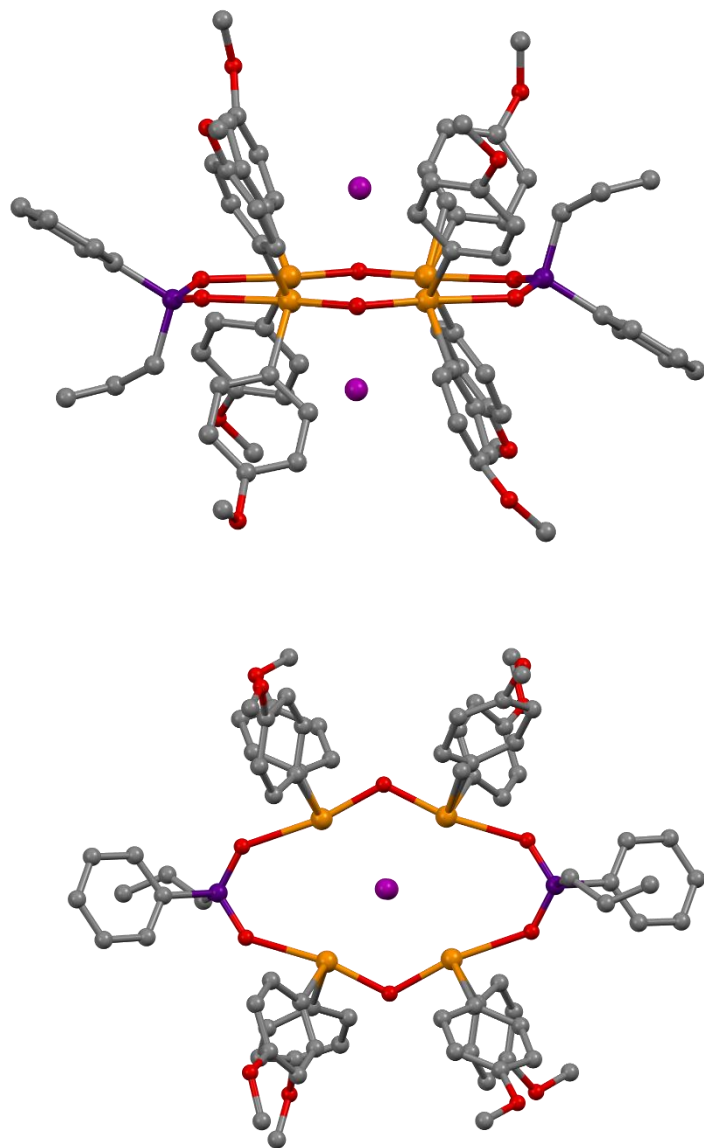

**Figure S19:** Structure of **I-TAM**. Hydrogens have been omitted for clarity. Colour code: Orange – Te, violet – I, purple – P, red – O, grey – C.

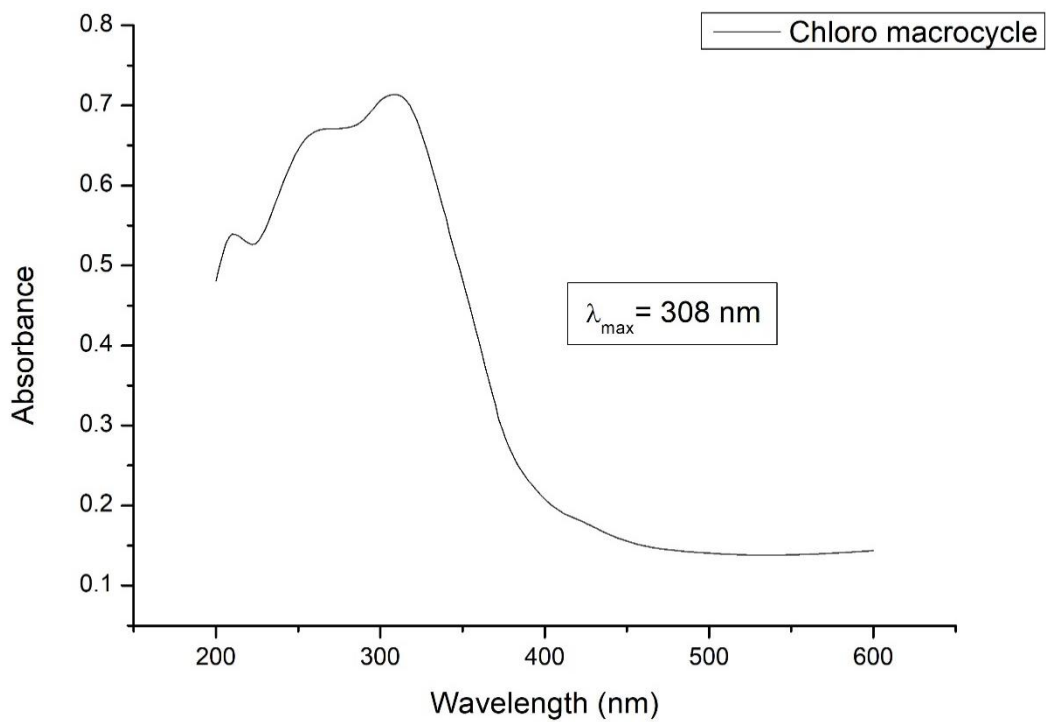

**Figure S20:** Solid state UV-Vis spectrum of **Cl-TAM**.

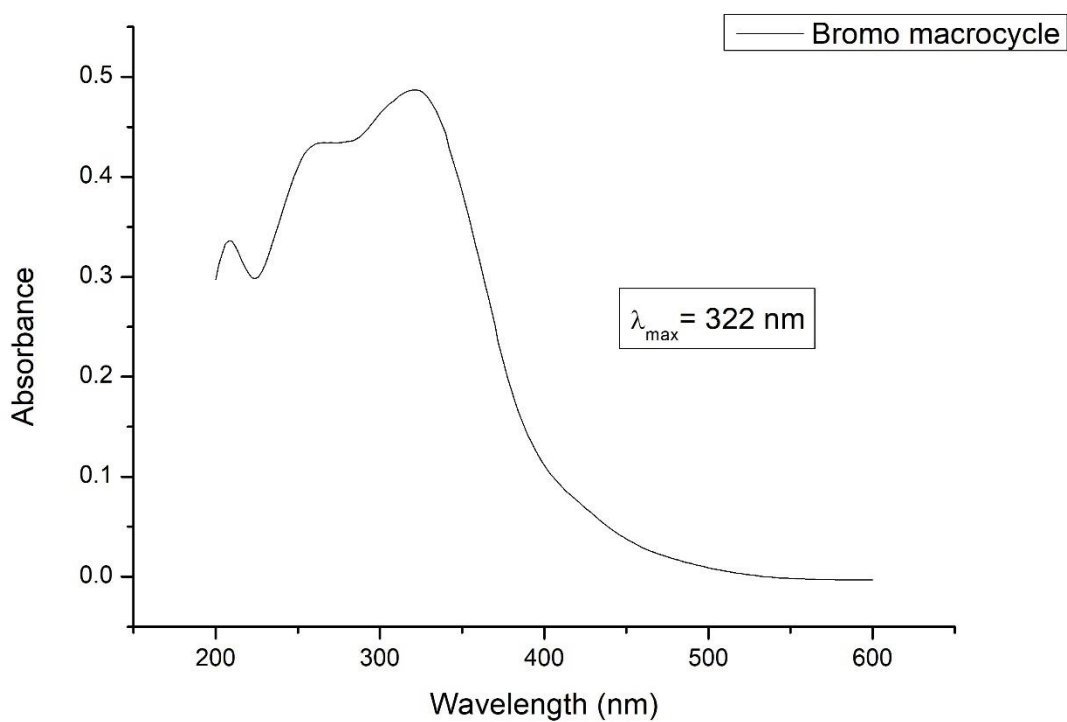

**Figure S21:** Solid state UV-Vis spectrum of **Br-TAM**.



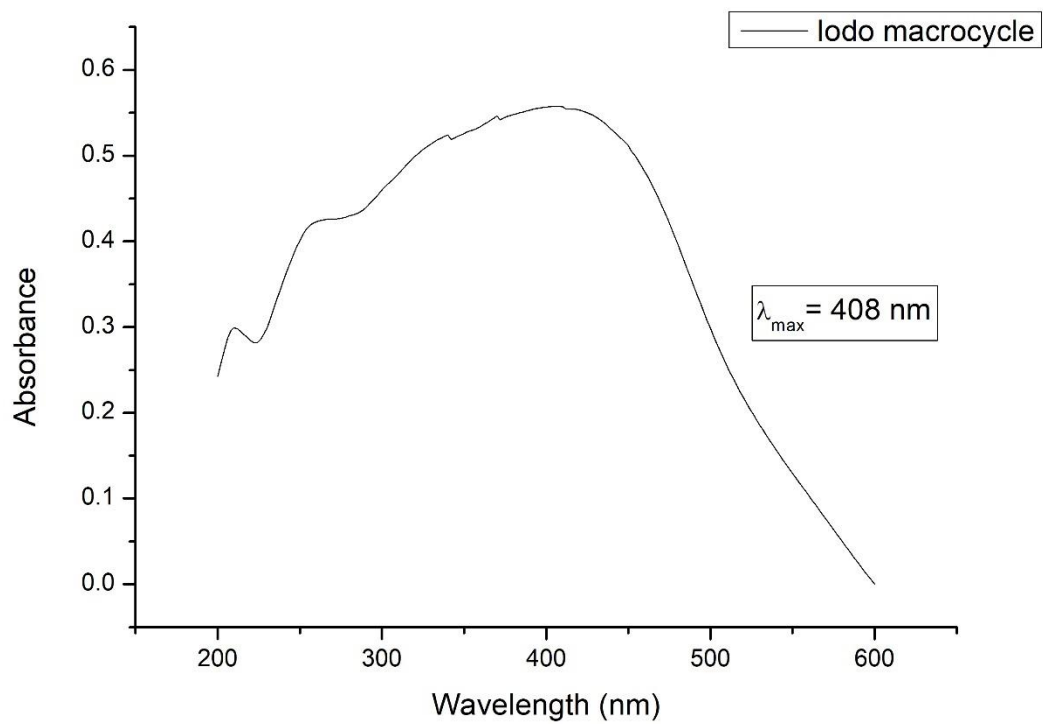

**Figure S22:** Solid state UV-Vis spectrum of I-TAM.

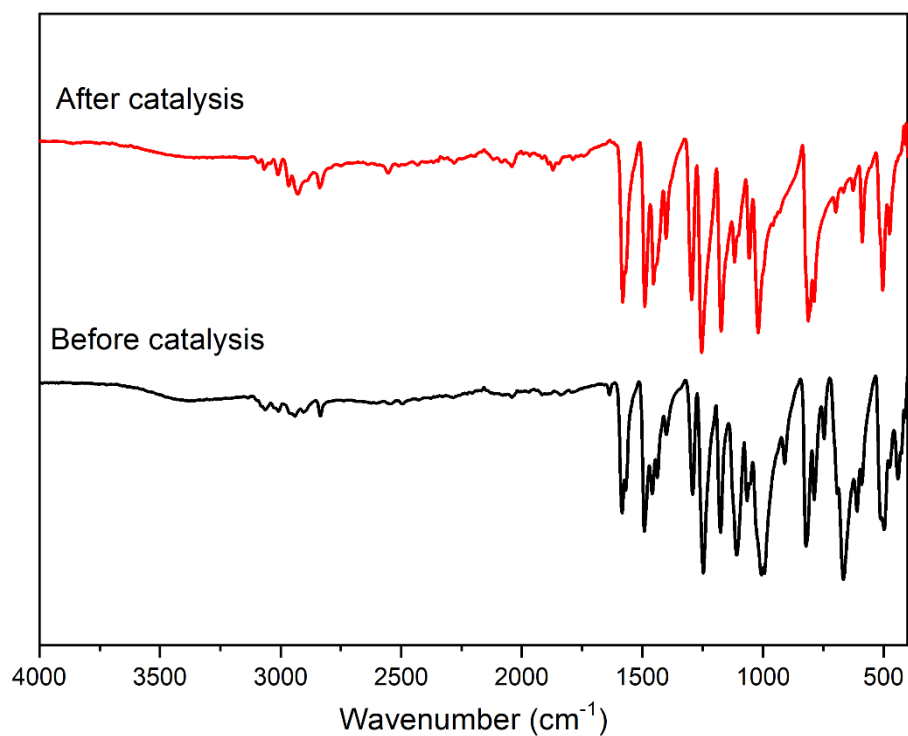

**Figure S23:** FTIR spectrum of **Cl-TAM** before and after catalysis.

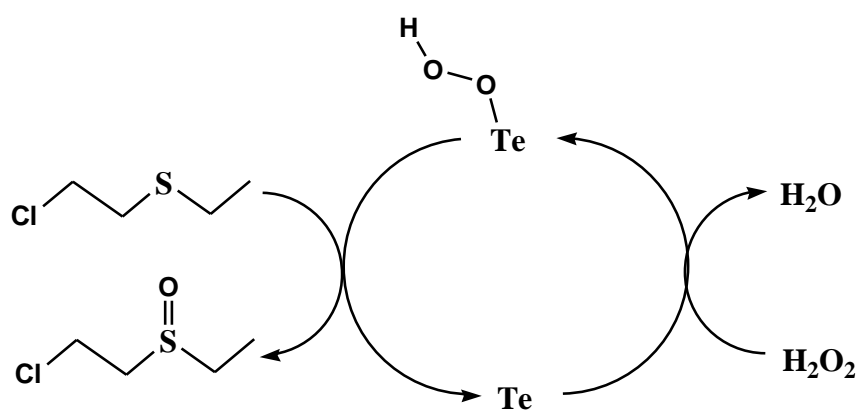

**Figure S24:** Plausible mechanism of CEES oxidation using tellurium macrocycle as catalysts.
